# Supplementary material
Source: Elsevier journal article supplement (https://www.sciencedirect.com/science/article/pii/S0001731020304087)
Supplement: mmc1 [file S0001731020304087:mmc1.pdf]

## DATOS SUPLEMENTARIOS

**Figura 1.** Flujo de estudios de la revisión sistemática.

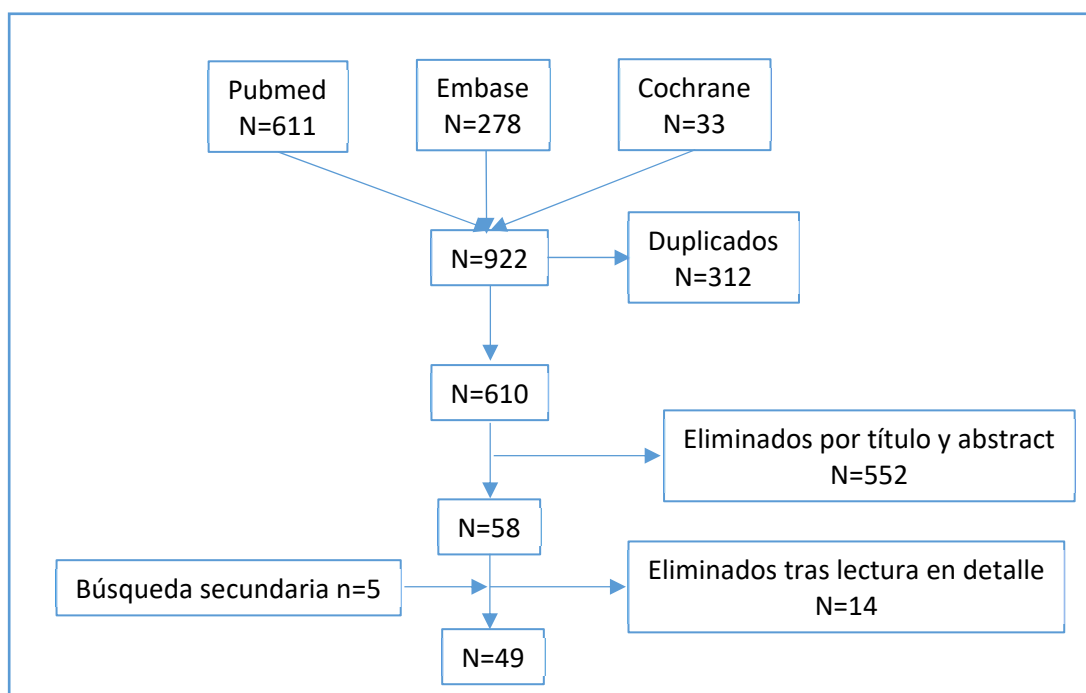

### Resultados del embarazo en pacientes con psoriasis.

**Abortos:** Un estudio de caso control objetivó una asociación significativa e independiente entre la psoriasis y abortos de repetición OR=2,10 (IC 95% 1,10-4,9) (1). Un pequeño estudio observacional encontró una media mayor de abortos espontáneos e inducidos en mujeres con psoriasis que mujeres sanas,  $0,42 \pm 0,58$  vs,  $0,26 \pm 0,63$  ( $p=0,002$ ), y  $0,32 \pm 0,60$  vs  $0,06 \pm 0,25$  ( $p=0,001$ ), respectivamente, pero no en el número de abortos de repetición (2). Sin embargo, en una gran cohorte no se encontró asociación significativa entre la psoriasis y la muerte fetal HR=1,05 (IC 95% CI 0,75–1,46) (3), al igual que en otra cohorte retrospectiva (4). Otra gran corte sí detectó una asociación significativa en los abortos espontáneos pero de magnitud muy similar a la de los controles (efecto muy limitado) (5).

**Prematuridad:** Un estudio prospectivo con más de 3.000 mujeres encontró una asociación significativa e independiente entre la psoriasis y el riesgo de prematuridad, OR=1,88 (IC 95% 1,27-2,79) (6). No en una cohorte retrospectiva (4), tampoco otra gran cohorte de base poblacional encontró este riesgo (ajustado) aumentado significativamente en mujeres con psoriasis (ni en pacientes con psoriasis leve, ni en las mujeres con psoriasis grave) (7).

**Bajo peso al nacer:** En una gran corte de base poblacional se encontró una asociación (ajustada) estadísticamente significativa entre esta variable y la psoriasis pero solo para las mujeres con psoriasis grave, OR=1,40 (IC 95% 1,04–1,89), y no para aquellas con psoriasis leve. No encontraron asociación con la psoriasis otros estudios (4, 8).

POC (incluye prematuridad como nacimiento antes de la semana 37, y bajo peso al nacer <2,5 kg): Una cohorte retrospectiva encontró una asociación estadísticamente significativa en varios modelos multivariados (4).

Macrosomía fetal: Un pequeño estudio observacional encontró un mayor porcentaje de macrosomía fetal en mujeres con psoriasis 13% vs 4,2% ( $p=0,020$ ) (2).

Grande para la edad gestacional: Un pequeño estudio observacional encontró un mayor porcentaje de niños grandes para la edad gestacional en mujeres con psoriasis 24% vs 12%, ( $p=0,020$ ) (2).

Pequeño para la edad gestacional: Una gran cohorte de base poblacional no encontró este riesgo (ajustado) aumentado significativamente en mujeres con psoriasis (ni en pacientes con psoriasis leve, ni en las mujeres con psoriasis grave) (7).

Malformaciones congénitas: No encontraron asociación con la psoriasis (8, 9).

La frecuencia de malformaciones fetales en la población general en nacidos vivos es del 3-5%.

Pre-eclampsia: Un extenso estudio poblacional realizado en Suecia y Dinamarca, encontró un riesgo aumentado (significativo e independiente) de pre-eclampsia  $OR=1,15$  (IC 95% 1,01–1,30) (8). Pero otros estudios más pequeños no encontraron asociación (2, 6).

Pre-eclampsia o eclampsia: Una gran cohorte de base poblacional no encontró este riesgo (ajustado) aumentado significativamente en mujeres con psoriasis (ni en pacientes con psoriasis leve, ni en las mujeres con psoriasis grave) (7).

Diabetes gestacional: Un extenso estudio poblacional realizado en Suecia y Dinamarca, encontró un riesgo aumentado (significativo e independiente) de diabetes gestacional  $OR=1,20$  (IC 95% 1,02–1,40) (8). Otro estudio pequeño no encontró diferencias (2).

HTA gestacional: Un extenso estudio poblacional realizado en Suecia y Dinamarca, encontró un riesgo aumentado (significativo e independiente) de HTA gestacional  $OR=1,17$  (IC 95% 1,02–1,35) (8). Otro estudio encontró resultados similares (2). Sin embargo, un pequeño estudio observacional no encontró diferencias con mujeres sanas X.

Hemorragia ante-parto: No encontró asociación con la psoriasis (8).

Tromboembolismo venoso: No encontró asociación con la psoriasis (8).

Crecimiento intrauterino retardado: No encontró asociación con la psoriasis (8).

Ruptura precoz de membranas: Un pequeño estudio observacional encontró un mayor número de ruptura precoz de membranas en mujeres con psoriasis que en mujeres sanas 16% vs 5,5% ( $p<0,008$ ) (2).

Partos por cesárea electiva: Un estudio de caso control objetivó una asociación significativa e independiente entre la psoriasis y el riesgo de parto por cesárea  $OR=4,1$ , (IC 95% 2,30–7,50) (1). Otra gran cohorte prospectiva internacional también  $OR=1,11$  (IC 95% 1,02–1,20) (8). Sin embargo no se obtuvo este resultado en otra cohorte retrospectiva (4), ni en otra gran cohorte de base poblacional (ni en pacientes con psoriasis leve, ni en las mujeres con psoriasis grave) (7).

Partos por cesárea urgente: Un extenso estudio poblacional realizado en Suecia y Dinamarca, encontró un riesgo aumentado (significativo e independiente) de parto por cesárea urgente OR=1,09 (IC 95% 1,01–1,18) (8).

Otros: Un pequeño estudio observacional encontró que los niños de padre con psoriasis tienen significativamente mayor peso al nacer que los hijos de madres con psoriasis (10). Mejor test de Apgar al nacer en hijos de mujeres con psoriasis que en mujeres sanas, pero no diferencia significativa (8). Otro pequeño estudio observacional no encontró diferencias entre mujeres con psoriasis y sanas en el porcentaje de oligoamnios, polihidramnios, placenta previa y desprendimiento de placenta (2). Por otro lado, un estudio caso-control anidado en una corte observó una asociación independiente y significativa entre la psoriasis materna y las enfermedades del espectro autista (11).

## REFERENCIAS

1. Ben-David G, Sheiner E, Hallak M, Levy A. Pregnancy outcome in women with psoriasis. *J. Reprod. Med.* 2008;53(3):183-7.
2. Cohen-Barak E, Nachum Z, Rozenman D, Ziv M. Pregnancy outcomes in women with moderate-to-severe psoriasis. *J. Eur. Acad. Dermatol. Venereol.* 2011;25(9):1041-7.
3. Harder E, Andersen AN, Kamper-Jorgensen M, Skov L. No increased risk of fetal death or prolonged time to pregnancy in women with psoriasis. *J Invest Dermatol.* 2014;134(6):1747-9.
4. Lima XT, Janakiraman V, Hughes MD, Kimball AB. The impact of psoriasis on pregnancy outcomes. *J. Invest. Dermatol.* 2012;132(1):85-91.
5. Seeger JD, Lanza LL, West WA, Fernandez C, Rivero E. Pregnancy and pregnancy outcome among women with inflammatory skin diseases. *Dermatology.* 2007;214(1):32-9.
6. Bandoli G, Chambers CD. Autoimmune conditions and comorbid depression in pregnancy: examining the risk of preterm birth and preeclampsia. *J. Perinatol.* 2017;37(10):1082-7.
7. Yang Y-W, Chen C-S, Chen Y-H, Lin H-C. Psoriasis and pregnancy outcomes: a nationwide population-based study. *J. Am. Acad. Dermatol.* 2011;64(1):71-7.
8. Broms G, Haerskjold A, Granath F, Kieler H, Pedersen L, Berglind IA. Effect of Maternal Psoriasis on Pregnancy and Birth Outcomes: A Population-based Cohort Study from Denmark and Sweden. *Acta Derm. Venereol.* 2018;98(8):728-34.
9. Kimball AB, Crow JA, Ridley K, Shear NH. Pregnancy outcomes in women with moderate to severe psoriasis: The PSOLAR experience. *J Am Acad Dermatol.* 2014;AB179.
10. Traupe H, van Gurp PJ, Happle R, Boezeman J, van de Kerkhof PC. Psoriasis vulgaris, fetal growth, and genomic imprinting. *Am J Med Genet.* 1992;42(5):649-54.
11. Croen LA, Grether JK, Yoshida CK, Odouli R, Van de Water J. Maternal autoimmune diseases, asthma and allergies, and childhood autism spectrum disorders: a case-control study. *Arch. Pediatr. Adolesc. Med.* 2005;159(2):151-7.
